# Supplementary material
Source: PubMed Central journal article supplement (PMC5461196)
Supplement: NIHMS865784-supplement-1.pdf [file NIHMS865784-supplement-1.pdf]

1 **Supplementary Files for Zehir, Benayed et al.**  
2 Mutational Landscape of Metastatic Cancer Revealed from Prospective Clinical  
3 Sequencing of 10,000 Patients

4

5

## 6 **Supplementary Tables**

7

8 **Supplementary Table 1:** Sample metadata for MSK-IMPACT cohort

9 **Supplementary Table 2:** Principal and detailed tumor types in MSK-IMPACT cohort

10 **Supplementary Table 3:** Gene lists for MSK-IMPACT version 1 and 2

11 **Supplementary Table 4:** Most frequently mutated codons in MSK-IMPACT cohort

12 **Supplementary Table 5:** *TERT* promoter mutations

13 **Supplementary Table 6:** Kinase fusions detected by MSK-IMPACT

14 **Supplementary Table 7:** Highly mutated tumors and dominant mutation signatures

15

16

## 17 **Supplementary Figures**

18

19 **Supplementary Figure 1:** Accrual of samples to MSK-IMPACT cohort

20 **Supplementary Figure 2:** Features of MSK-IMPACT cohort

21 **Supplementary Figure 3:** Success rates and attrition in MSK-IMPACT workflow

22 **Supplementary Figure 4:** Sequencing success as function of specimen characteristics

23 **Supplementary Figure 5:** Location of metastatic sites

24 **Supplementary Figure 6:** Distribution of sequence coverage

25 **Supplementary Figure 7:** Distribution of VAF for mutations detected by MSK-IMPACT

26 **Supplementary Figure 8:** Relationship between mutation and copy number burden

27 **Supplementary Figure 9:** Importance of broad and deep coverage on sensitivity

28 **Supplementary Figure 10:** Correlation of gene alterations in TCGA and MSK-IMPACT  
29 by tumor types

30 **Supplementary Figure 11:** Position of mutations in ESR1

31 **Supplementary Figure 12:** Position of mutations in EGFR

32 **Supplementary Figure 13:** Novel recurrent CDK5RAP2-BRAF fusion

33 **Supplementary Figure 14:** Correlation in total mutation burden between MSK-IMPACT  
34 and whole exome sequencing

35

36

37 **Supplementary Figure 1**  
38  
39

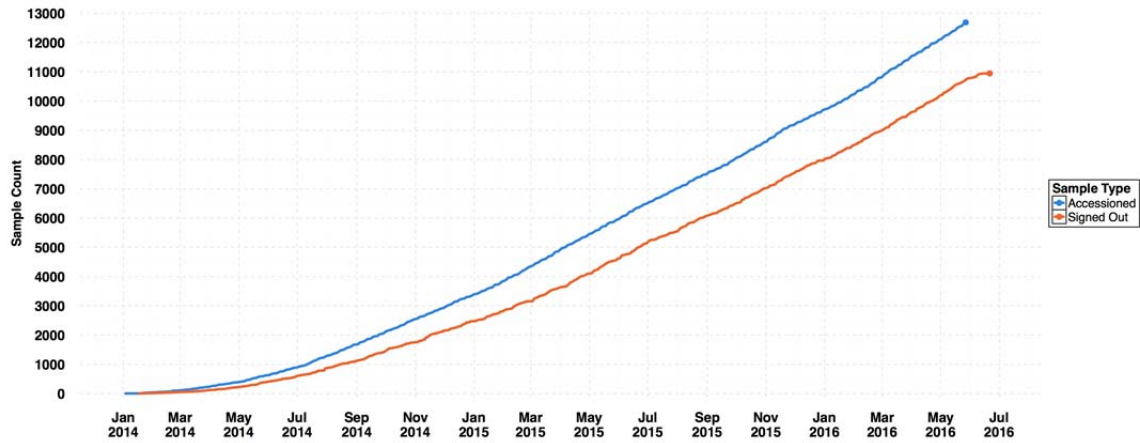

40  
41  
42  
43  
44  
45  
46  
47  
48  
49

**Supplementary Figure 1:** Accrual of samples to MSK-IMPACT cohort for duration of this study. The blue line indicates cases that were accessioned into the laboratory while the orange line indicates samples that were successfully sequenced and a clinical report indicating the genomic findings was issued into patient's medical record

50 **Supplementary Figure 2**  
51

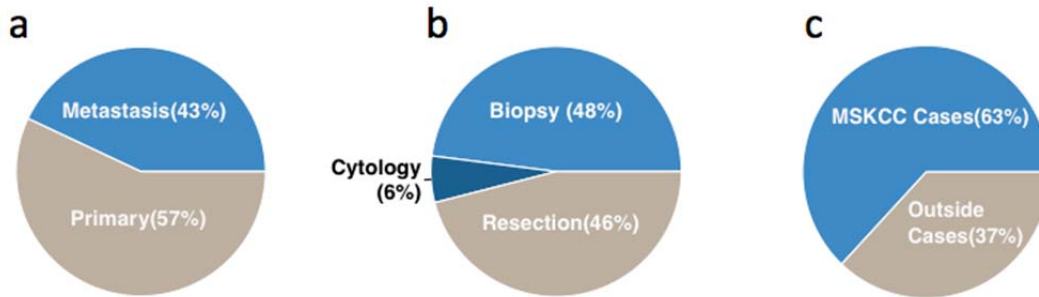

52  
53  
54  
55  
56  
57  
58  
59  
60  
61  
62

**Supplementary Figure 2: Features of MSK-IMPACT cohort.** (a) Percentage of primary and metastatic tumors submitted for MSK-IMPACT sequencing. (b) Percentage of different specimen types (surgical resection, biopsy, and cytological specimen) submitted for sequencing. (c) Percentage of specimens from procedures performed in-house at MSKCC versus submitted from outside hospitals.

63 **Supplementary Figure 3**  
64

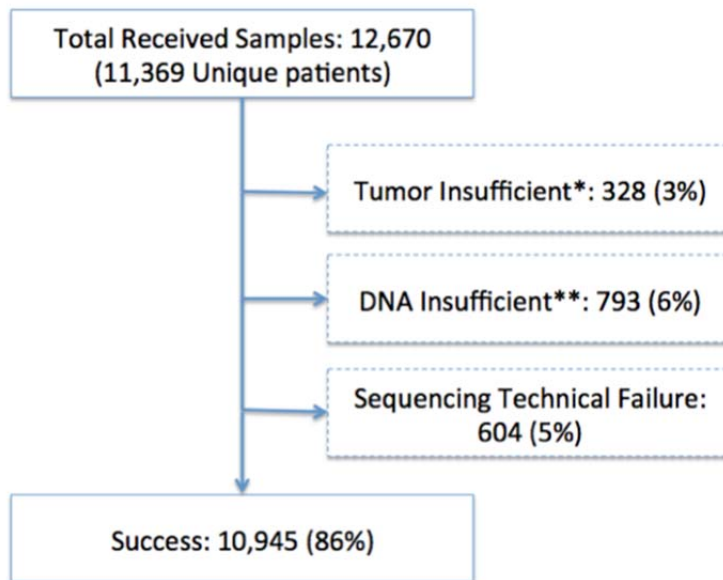

\* <10% Tumor Purity  
\*\* <50ng

65  
66  
67  
68  
69  
70  
71  
72  
73  
74  
75  
76  
77  
78  
79  
80  
81  
82  
83  
84

**Supplementary Figure 3: Success rates and attrition in MSK-IMPACT workflow.** A total of 12,670 tumor samples from 11,369 unique patients were submitted for MSK-IMPACT sequencing between January 2014 and May 2016. 328 cases were deemed insufficient due to low tumor purity (<10%) based on histopathology review of hematoxylin and eosin (H&E) stained slides. After DNA extraction and quantification, an additional 793 cases were found to have an insufficient DNA yield (<50ng) and were not sequenced. Out of the 11,549 sequenced cases, 604 failed one of multiple quality control metrics, including average unique sequence coverage (<50X), biased coverage distribution, and evidence of sample contamination. Samples with no detectable alterations (including silent mutations) were also excluded if the estimated tumor purity was <20% or the average unique sequence coverage was <200X due to the risk of false negatives. In total, 10,945 cases were successfully sequenced for a final assay success rate of 86%. Due to the submission of replacement specimens for patients with failed cases, we successfully sequenced at least one tumor in 91% (10,336) of patients.

85 **Supplementary Figure 4**

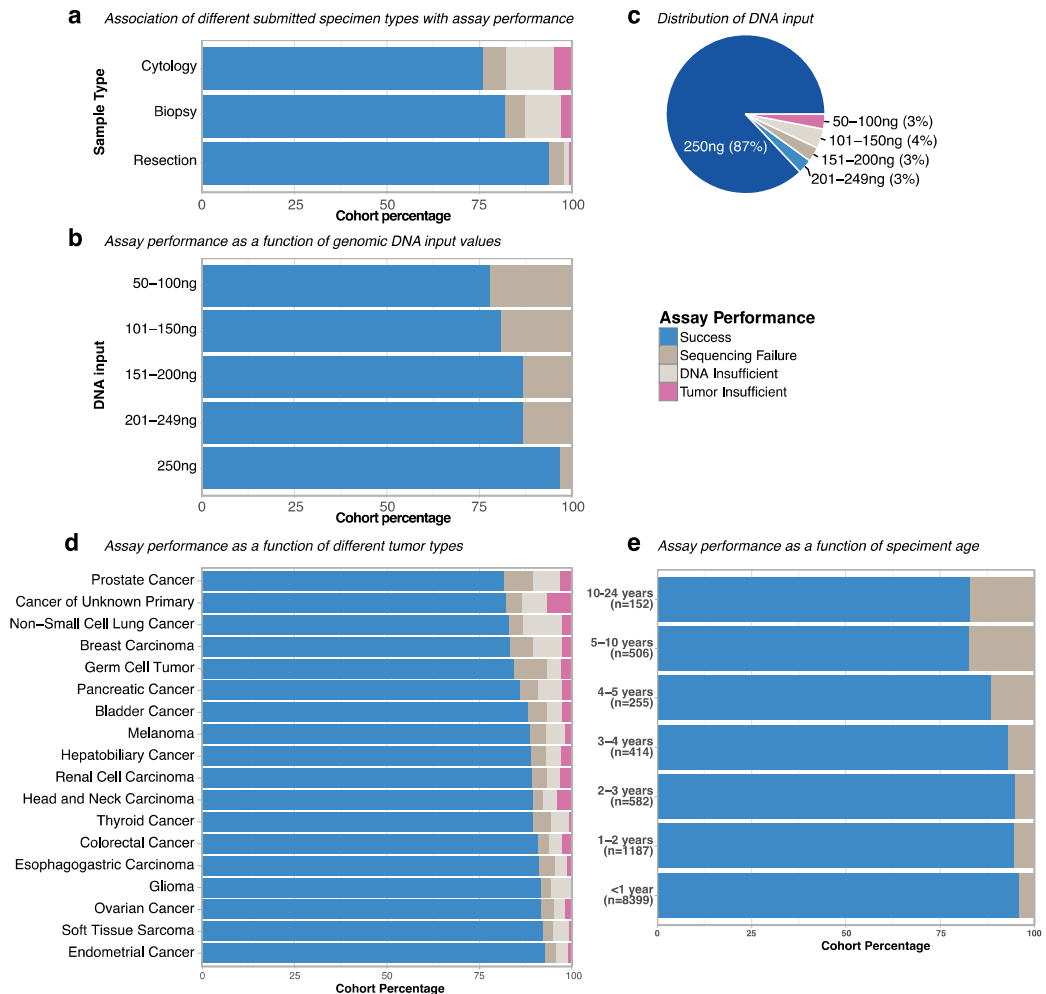

86  
87  
88  
89  
90  
91  
92  
93  
94  
95  
96  
97  
98  
99  
100  
101  
102

**Supplementary Figure 4: Sequencing success as function of specimen characteristics.** (a) Assay performance as a function of specimen type. Resections had the highest overall success rate (94%), followed by biopsies (82%) and cytology samples (76%). (b) Assay performance as a function of genomic DNA input to sequence library preparation. Samples with the optimal DNA input of 250ng, which constituted 87% of the sequenced samples, achieved the highest success rate (97%), whereas samples with DNA input ranging from 50-100ng achieve the lowest success rate (78%), while still producing informative results for the large majority of cases. (c) Distribution of DNA input across all sequenced samples. (d) Assay performance as a function of 18 different tumor types. Only tumor types represented by at least 200 individual cases were considered for this analysis. (e) Assay performance as a function of specimen age. Age was calculated as the number of years between the date of surgical procedure and DNA extraction. The success rate was high for specimen stored for less than one year (96%) but it is also relatively high for specimen older than 5 years (83%).

103 **Supplementary Figure 5**  
104

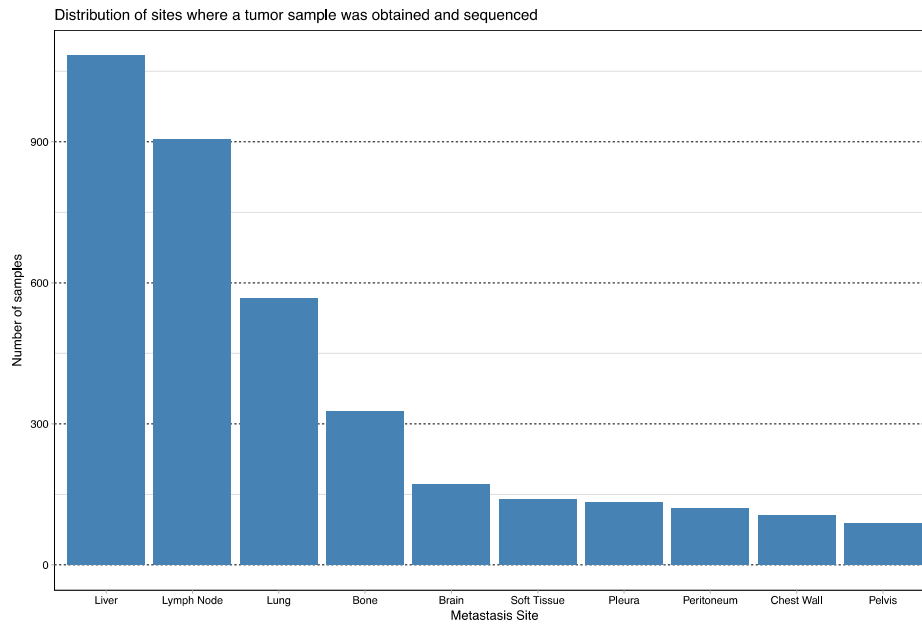

105  
106  
107  
108  
109  
110  
111  
112  
113

**Supplementary Figure 5:** Location of metastatic sites. The bar chart displays the most common sites where metastatic tumor samples were biopsied and sent for IMPACT sequencing.

114 **Supplementary Figure 6**  
115  
116

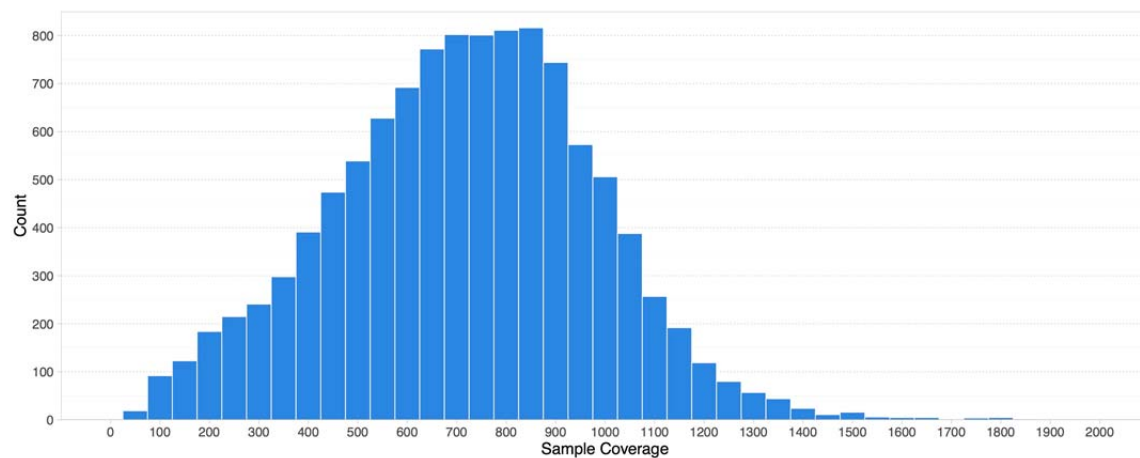

117  
118  
119  
120  
121  
122  
123  
124  
125

**Supplementary Figure 6:** Distribution of mean unique sequence coverage for samples successfully sequenced by MSK-IMPACT and reported.

126 **Supplementary Figure 7**  
127  
128

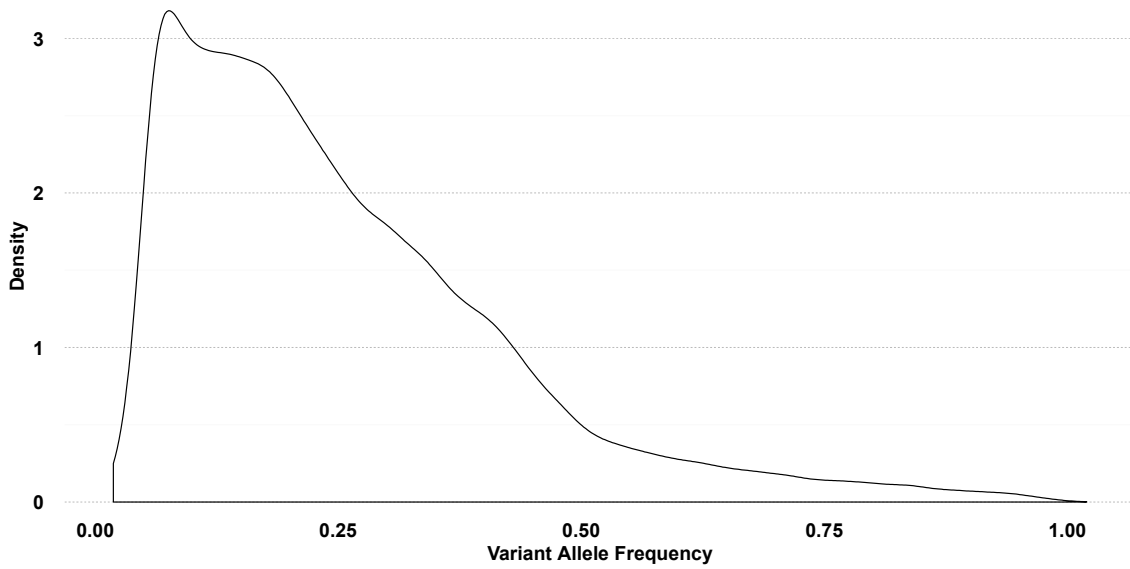

129  
130  
131  
132  
133  
134  
135  
136

**Supplementary Figure 7:** Distribution of VAF for mutations detected and reported by MSK-IMPACT.



137 **Supplementary Figure 8**  
138  
139

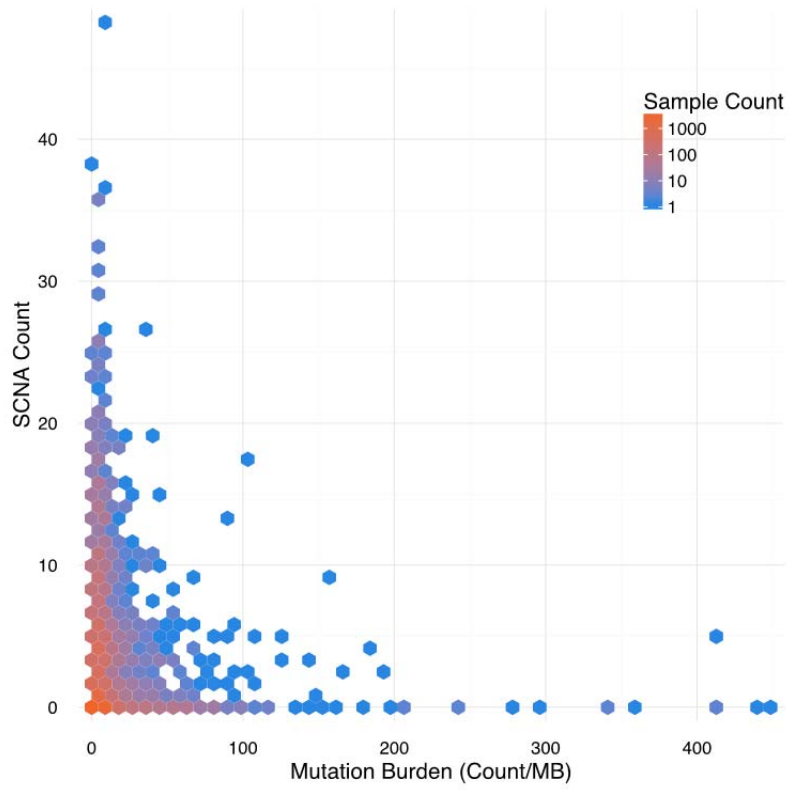

140  
141  
142  
143  
144  
145  
146  
147  
148  
149

**Supplementary Figure 8:** Relationship between mutation and copy number burden.  
The color of each hexagonal bin indicates the number of patients in that bin. SCNA = somatic copy number alteration.

150 **Supplementary Figure 9**  
151  
152

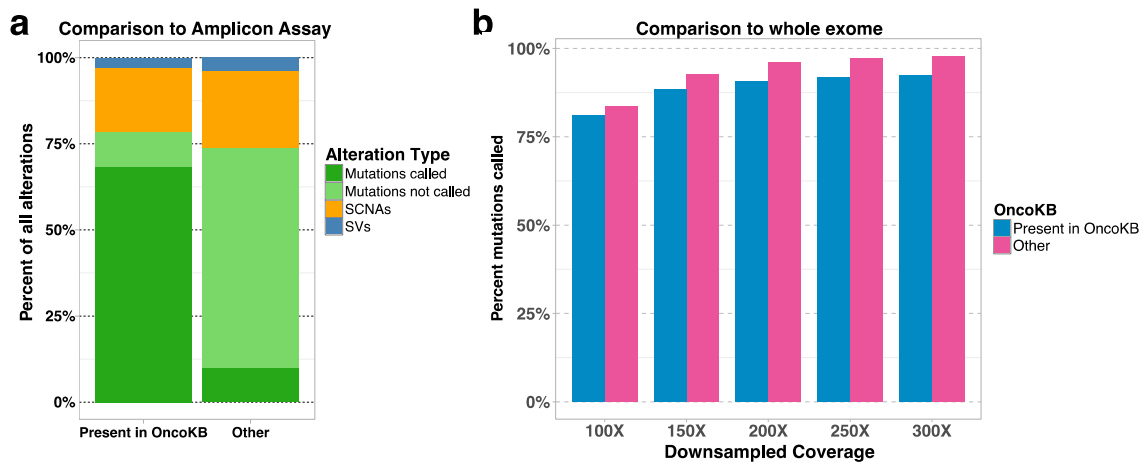

153  
154  
155  
156 **Supplementary Figure 9:** Importance of broad and deep coverage on sensitivity. MSK-  
157 IMPACT results were compared to those attainable by alternate tumor sequencing  
158 assays (a) Comparison to amplicon-based hotspot panels. Stacked bar charts show the  
159 percentage of events present in OncoKB (Levels 1, 2, and 3) and whether they fell within  
160 the target region of either of two commercially-available amplicon assays (Methods).  
161 Somatic copy number alterations (SCNAs) and structural variants (SVs) were not reliably  
162 detectable by amplicon assays. (b) Comparison to whole exome sequencing. Coverage  
163 at mutations identified by MSK-IMPACT was downsampled to simulate exome  
164 sequencing coverage (Methods). The bar chart shows the percentage of events that  
165 would be called at different levels of whole exome sequencing coverage, stratified by the  
166 presence of OncoKB annotations.  
167  
168  
169  
170

171  
172

### Supplementary Figure 10

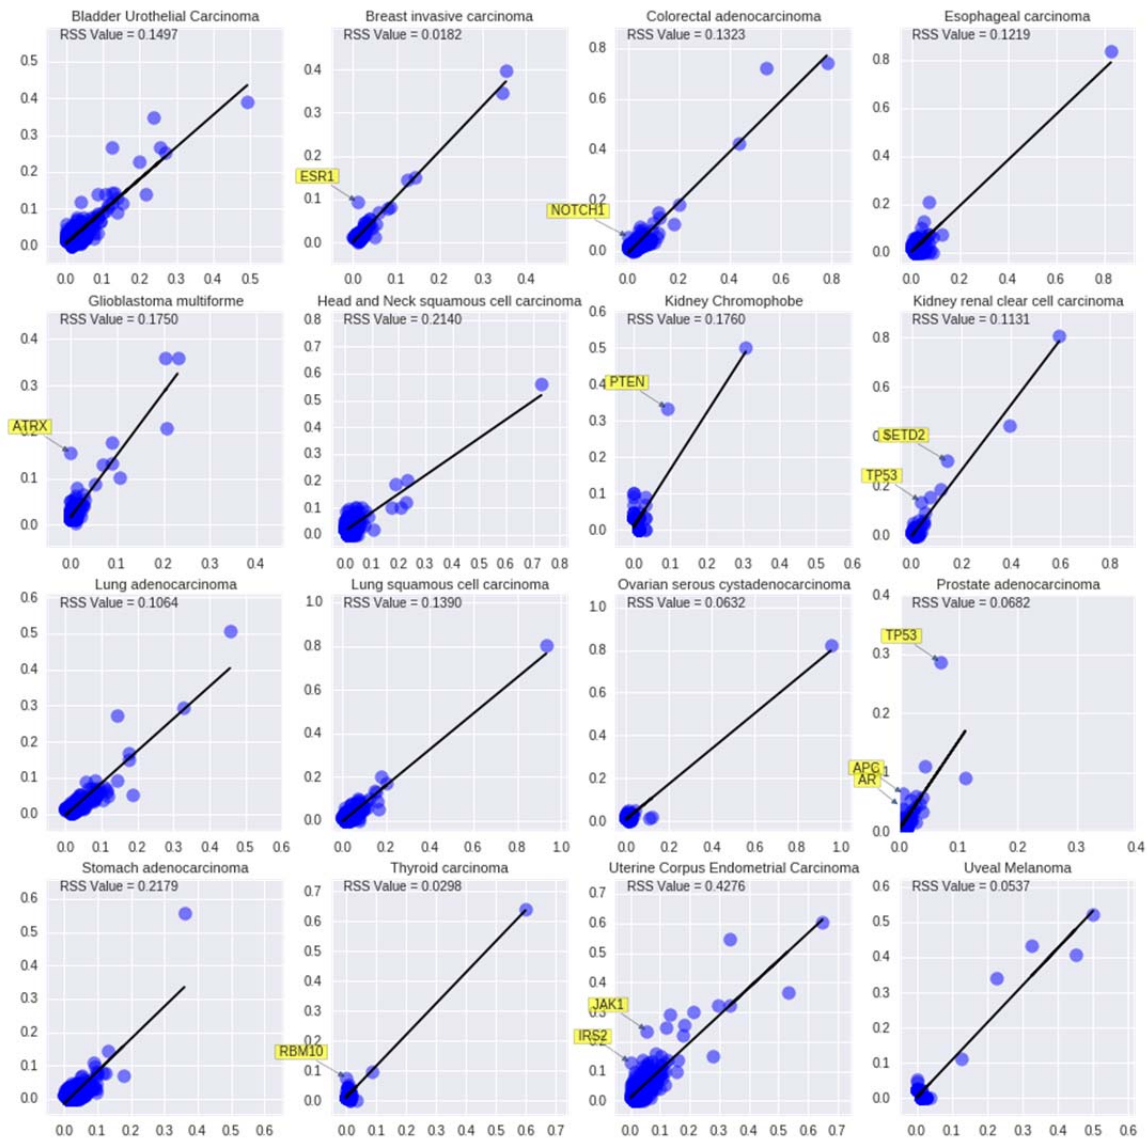

173  
174  
175  
176  
177  
178  
179  
180

**Supplementary Figure 10:** Correlation of gene alterations in TCGA and MSK-IMPACT by tumor types. The genes that were most significantly enriched for alterations in the MSK-IMPACT cohort are labeled.

181 **Supplementary Figure 11**  
 182

*ESR1* mutations

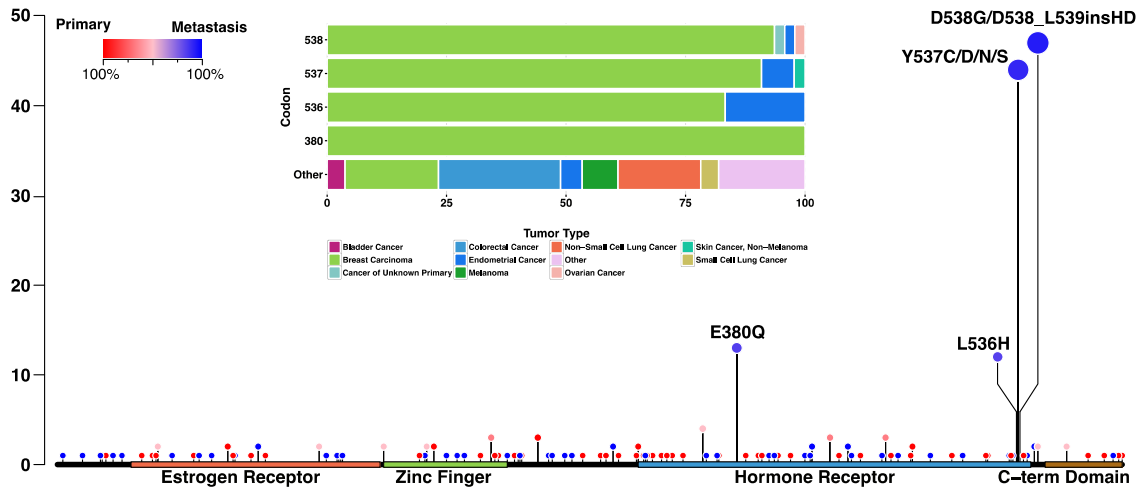

183  
 184  
 185  
 186  
 187  
 188  
 189  
 190  
 191  
 192  
 193  
 194

**Supplementary Figure 11:** Position of mutations in *ESR1*. The lollipop plot displays all individual somatic mutations in *ESR1* identified across the whole cohort. Sites of mutation are colored according to whether mutations are enriched in primary samples or metastasis samples. Frequently mutated codons are labeled. Inset shows the distribution of tumor types for each of the most frequently mutated codons.

195 **Supplementary Figure 12**  
 196

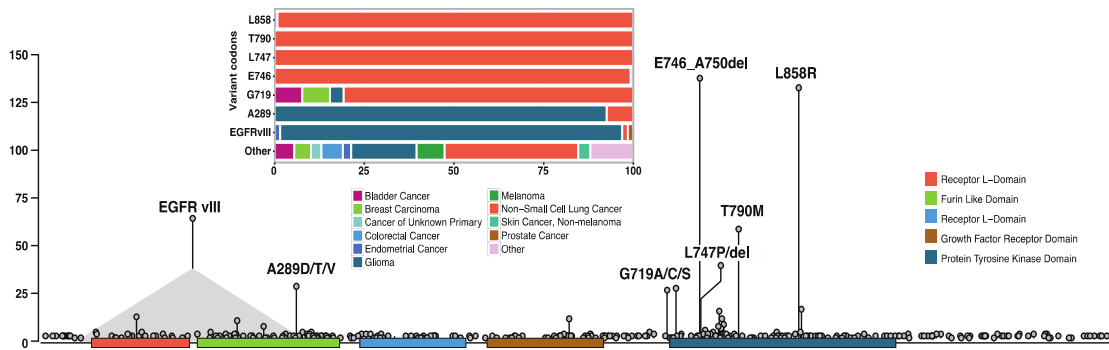

197  
 198 **Supplementary Figure 12:** Position of mutations in *EGFR*. The lollipop plot displays all  
 199 individual somatic mutations in *EGFR* identified across the whole cohort. Frequently  
 200 mutated codons are labeled. Inset shows the distribution of tumor types for each of the  
 201 most frequently mutated codons, indicating that lung cancers typically harbor kinase  
 202 domain mutations whereas gliomas typically harbor mutations in the extracellular  
 203 domain.

204  
 205  
 206  
 207  
 208

209  
210

### Supplementary Figure 13

P-0004203-T01-IM5 : Melanoma

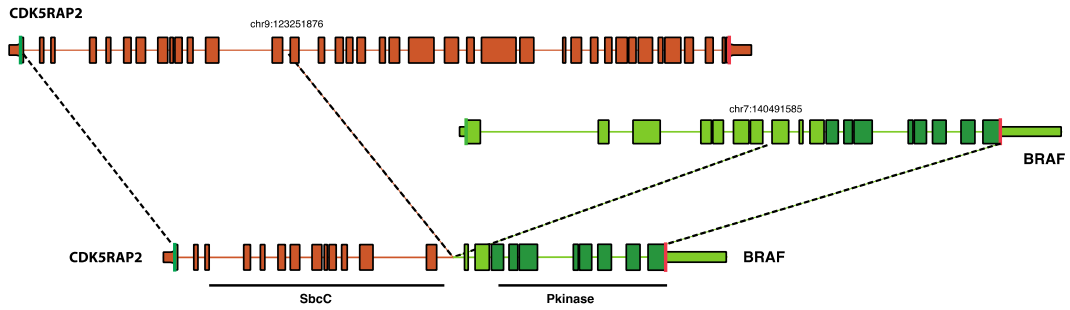

P-0005461-T02-IM5 : Melanoma

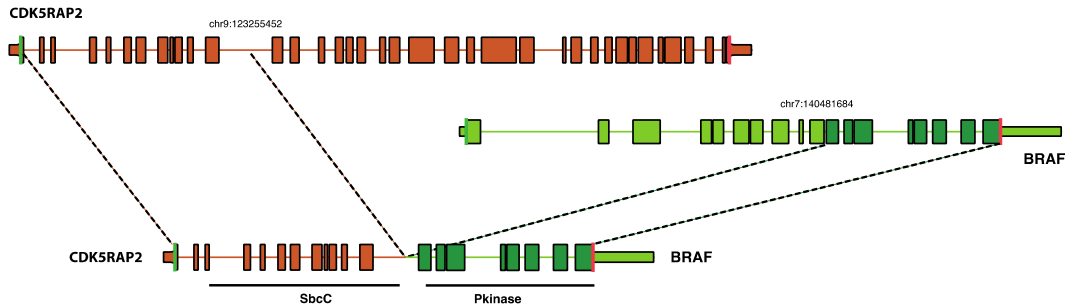

211  
212  
213  
214  
215  
216  
217  
218  
219

**Supplementary Figure 13:** Novel recurrent *CDK5RAP2-BRAF* fusion. Genomic structures of two *CDK5RAP2-BRAF* fusions identified in two different melanoma samples are shown. Boxes indicate exons, and protein domains are annotated.

220 **Supplementary Figure 14**  
221  
222

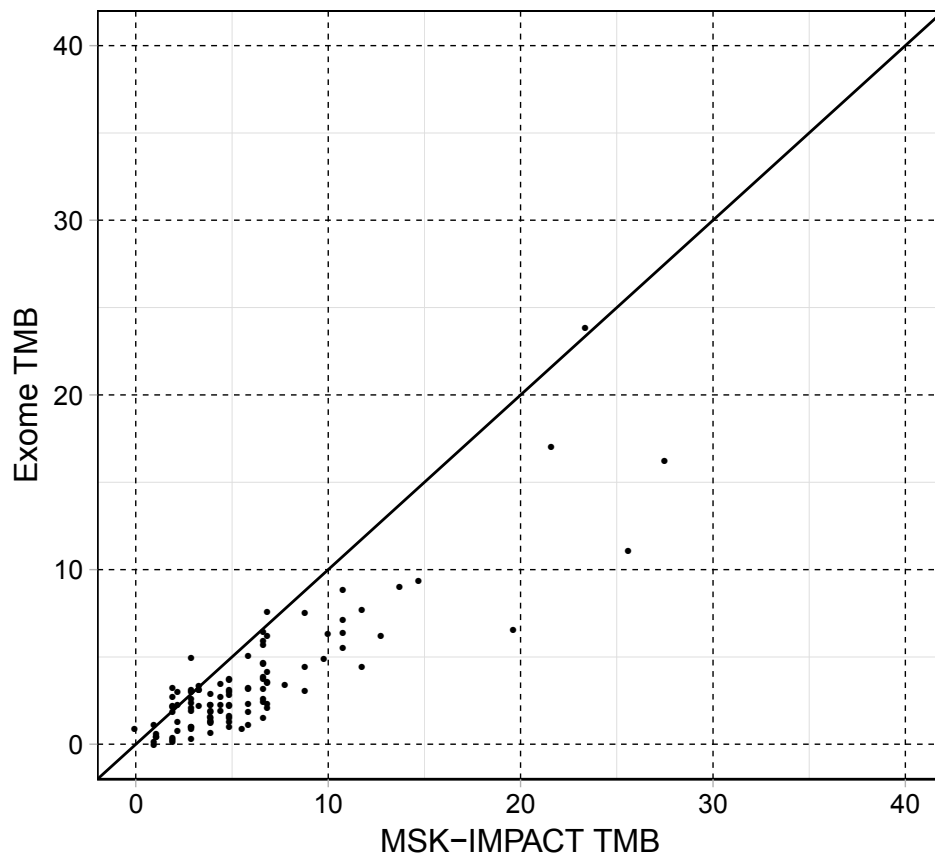

223  
224  
225  
226  
227  
228  
229  
230  
231

**Supplementary Figure 14:** Correlation in tumor mutation burden (TMB) between MSK-IMPACT and whole exome sequencing. TMB was compared for 135 tumors where MSK-IMPACT and whole exome capture were performed for the same DNA library ( $R^2=0.76$ ).
